# Supplementary material
Source: MDPI journal article supplement (https://www.mdpi.com/2071-1050/13/24/14058)
Supplement: s1 [file s1]

## Supplementary

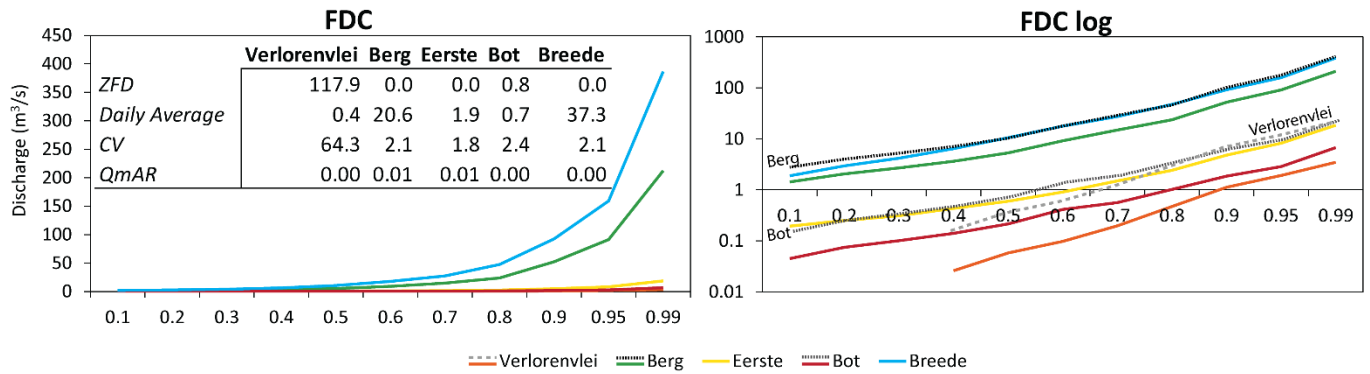

**Figure S1.** (a) Flow duration curve and (b) log flow duration curve of measured streamflow data in each study catchment with statistics of Zero flow days (ZFD), daily average flow ( $\text{m}^3/\text{s}$ ), coefficient of variation and daily average flow in relation to sub-basin area (QmAR).

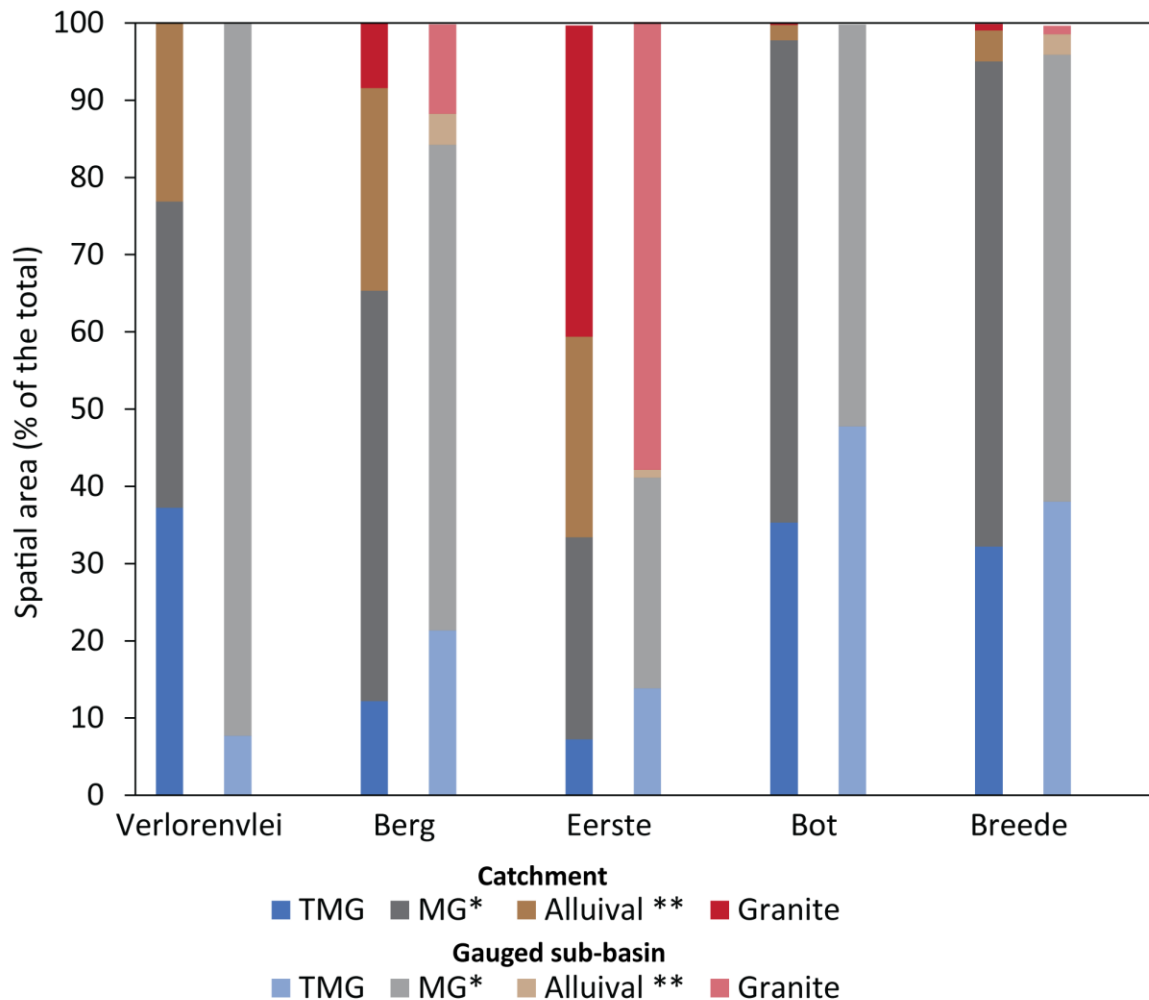

**Figure S2.** Total area of the Table Mountain Group (TMG), Malmesbury Shale (MG), Alluvial sediments and Cape Granite Suite for each catchment and the gauged sub-basin (transparent colours) where the MG shales group include other shales such as the Witteberg, Eccia, Dwyka, Bokkeveld and Uitenhage and the alluvium include quaternary sediments and unclassified units.

**Table S1.** The total gauged area (streamflow) of each of the study catchments with the percentage of the catchment area.

| <b>Catchment name</b> | <b>Area</b> | <b>% Total</b> |
|-----------------------|-------------|----------------|
| Verlorenvlei          | 663         | 36             |
| Berg                  | 3064        | 40             |
| Eerste                | 328         | 53             |
| Bot                   | 252         | 29             |
| Breede                | 9849        | 79             |

**Table S1.** A list of the parameters and the parameter ranges used in the Monte -Carlo Analysis which was used to generate the sensitivity analysis to understand the relative importance of different parameters for each catchment's simulated streamflow.

| Name of parameter | MCA Range    |        |        |        |        |              |        |        |        |        |
|-------------------|--------------|--------|--------|--------|--------|--------------|--------|--------|--------|--------|
|                   | Upper bounds |        |        |        |        | Lower bounds |        |        |        |        |
|                   | Verlorenvlei | Berg   | Eerste | Bot    | Breede | Verlorenvlei | Berg   | Eerste | Bot    | Breede |
| AC_Adaptation     | 1.65         | 1.49   | 1.38   | 1.62   | 1.48   | 1.35         | 1.22   | 1.13   | 1.37   | 1.21   |
| FC_Adaptation     | 1.64         | 1.57   | 1.64   | 1.65   | 0.77   | 1.35         | 1.28   | 1.34   | 1.35   | 0.63   |
| gwRG1Fact         | 0.02         | 11.89  | 0.07   | 0.26   | 5.32   | 0.01         | 9.73   | 0.06   | 0.24   | 4.36   |
| gwRG1RG2dist      | 1.10         | 0.69   | 0.63   | 1.06   | 0.79   | 0.90         | 0.57   | 0.51   | 0.94   | 0.65   |
| gwRG2Fact         | 3.40         | 0.01   | 10.95  | 4.94   | 0.02   | 2.78         | 0.01   | 8.96   | 2.94   | 0.02   |
| soilConcRD1       | 2.75         | 1.63   | 2.73   | 2.75   | 1.57   | 2.25         | 1.34   | 2.23   | 2.25   | 1.28   |
| soilConcRD2       | 4.35         | 5.31   | 4.22   | 5.37   | 1.95   | 3.56         | 4.35   | 3.45   | 4.61   | 1.59   |
| soilDiffMPSLPS    | 5.36         | 9.23   | 1.27   | 9.66   | 3.92   | 4.39         | 7.55   | 1.04   | 9.43   | 3.21   |
| soilDistMPSLPS    | 9.01         | 6.24   | 0.31   | 3.32   | 4.80   | 7.37         | 5.11   | 0.26   | 3.26   | 3.93   |
| soilLinRed        | 0.19         | 0.98   | 0.70   | 0.07   | 0.91   | 0.16         | 0.80   | 0.57   | 0.01   | 0.75   |
| soilMaxInfSummer  | 125.28       | 130.58 | 171.74 | 215.45 | 162.50 | 102.50       | 106.84 | 140.51 | 184.23 | 132.95 |
| soilMaxinfWinter  | 169.57       | 216.63 | 61.09  | 100.41 | 219.47 | 138.74       | 177.24 | 49.98  | 89.30  | 179.57 |
| soilMaxPerc       | 25.33        | 14.97  | 29.26  | 22.64  | 21.71  | 20.72        | 12.25  | 23.94  | 17.32  | 17.76  |
| soilOutLPS        | 3.19         | 7.62   | 1.41   | 8.70   | 2.93   | 2.61         | 6.23   | 1.15   | 8.45   | 2.40   |
| flowrouteTA       | 3.30         | 11.60  | 10.45  | 3.06   | 10.57  | 2.70         | 9.49   | 8.55   | 1.16   | 8.65   |

**Table S3.** Total area of the Table Mountain Group (TMG), Malmesbury Shale (MG), Alluvial sediments and Cape Granite Suite for each catchment and the gauged sub-basin (transparent colours) where the MG shales group include other shales such as the Witteberg, Eccra, Dwyka, Bokkeveld and Uitenhage and the alluvium include quaternary sediments and unclassified units.

| Catchment name | Total area (%) |     |             |         |
|----------------|----------------|-----|-------------|---------|
|                | TMG            | MG* | Alluival ** | Granite |
| Verlorenvlei   | 37             | 40  | 23          |         |
| Gauged         | 8              | 92  |             |         |
| Berg           | 12             | 53  | 26          | 8       |
| Gauged         | 21             | 63  | 0           | 12      |
| Eerste         | 7              | 26  | 26          | 40      |
| Gauged         | 14             | 27  | 0           | 58      |
| Bot            | 35             | 62  | 1           | 0       |
| Gauged         | 48             | 51  |             |         |
| Breede         | 32             | 63  | 3           | 1       |
| Gauged         | 37             | 58  | 3           | 1       |
